# Supplementary material for: Cytokines increase engraftment of human acute myeloid leukemia cells in immunocompromised mice but not engraftment of human myelodysplastic syndrome cells
Source: PubMed Central journal article supplement — Haematologica. 2018 Mar 15;103(6):959–71. doi: 10.3324/haematol.2017.183202 (PMC6058784; doi:10.3324/haematol.2017.183202), 2018-06
Supplement: 2017_183202-_Disclosures_and_Contributions.pdf [file 2017_183202-_Disclosures_and_Contributions.pdf]

Haematologica  
HAEMATOL/2017/183202  
Version 3

Cytokines increase engraftment of human acute myeloid leukemia cells  
in immunocompromised mice but not engraftment of human  
myelodysplastic syndrome cells

Maria Krevvata, Xiaochuan Shan, Chenghui Zhou, Cedric Dos Santos,  
Georges Habineza Ndikuyeze, Anthony Secreto, Joshua Glover,  
Winifred Trotman, Gisela Brake-Silla, Selene Nunez-Cruz, Gerald  
Wertheim, Hyun-Jeong Ra, Elizabeth Griffiths, Charalampos  
Papachristou, Gwenn Danet-Desnoyers, and Martin Carroll

Disclosures: None

Contributions: Contributions: MK, XS, CZ and CDS designed research, analyzed and interpreted data and wrote the paper. SNC generated the lentiviral particles, GW performed the immunohistochemistry, and EG provided with frozen patient samples. GHN, AS, JG WT, GBS and HJR performed research and reviewed paper. CP and MC analyzed data and reviewed manuscript. GDD designed research, analyzed, interpreted data and edited the paper.
