# Supplementary material for: Cytokines increase engraftment of human acute myeloid leukemia cells in immunocompromised mice but not engraftment of human myelodysplastic syndrome cells
Source: PubMed Central journal article supplement — Haematologica. 2018 Mar 15;103(6):959–71. doi: 10.3324/haematol.2017.183202 (PMC6058784; doi:10.3324/haematol.2017.183202), 2018-06
Supplement: HAEMATOL-2017-183202v3-Krevvata-01.pdf [file HAEMATOL-2017-183202v3-Krevvata-01.pdf]

# The use of the strains NSG and NSG-S to study the effects of human cytokines on engraftment and growth of AML and MDS

Specimens

## Acute myeloid leukemia (AML)

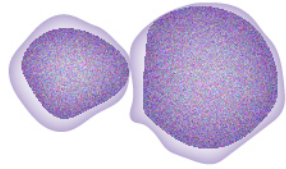

- T-cell AML cells

## Myelodysplastic syndrome (MDS)

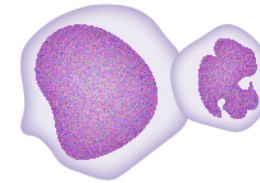

- Human bone MNC alone
- Human bone MNC + MSC

Engraftment

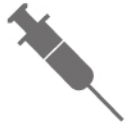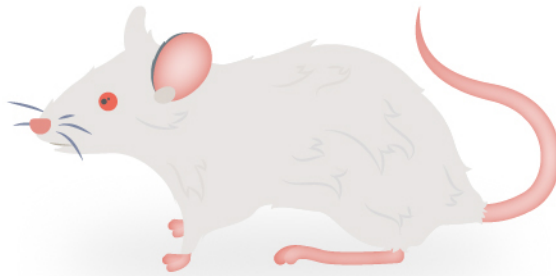

NSG mice

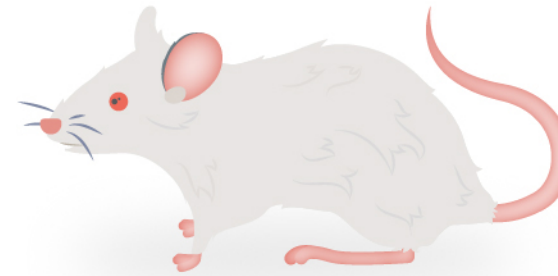

NSG-S mice  
expressing SCF, GM-CSF, IL-3

## AML

- 50% of primary AML samples transplanted in NSG mice were able to engraft (>0.5% human blasts in marrow)
- 82% of primary AML samples transplanted in NSG-S mice were able to engraft
- Significantly higher leukemia burden in NSG-S compared to NSG mice

## MDS

- 2% of primary MDS samples transplanted in NSG-S mice were able to engraft
- Co-injection of MSC did not enhance human MDS cells engraftment
